# Supplementary material for: A Non-Canonical Interface of SNX9 PX Domain Selectively Sequesters PI(3,4)P2 Lipids, Protecting Them from Hydrolysis
Source: Research Square preprint supplement (doi:10.21203/rs.3.rs-6573900/v1), 2025-05-30
Supplement: Supplementary file 1 [file 48463debc22a90fdf02feb74.pdf]

# Supplementary Materials for

## A Non-Canonical Interface of SNX9 PX Domain Selectively Sequesters PI(3,4)P<sub>2</sub> Lipids, Protecting Them from Hydrolysis

J. R. Beiter *et al.*

\*Corresponding Author Email: [feng-ching.tsai@curie.fr](mailto:feng-ching.tsai@curie.fr)

**This PDF file includes:**

**Supplementary Figure 1.** PI(3,4)P<sub>2</sub> trajectory trace plots for all replicates

**Supplementary Figure 2.** PI(4,5)P<sub>2</sub> trajectory trace plots for all replicates

**Supplementary Figure 3.** DOPS trajectory trace plot for the top leaflet in all replicates

**Supplementary Figure 4.** DOPS trajectory trace plot for the top leaflet in all replicates

**Supplementary Figure 5.** Electrostatic map of the PXBAR domain and autoinhibition motif

**Supplementary Table 1.** PIP<sub>2</sub> Occupancy values for the SNX9 PX-BAR dimer

**Supplementary Figure 6.** Composite violin plot of average distance traveled of PIP<sub>2</sub> lipids

**Supplementary Figure 7.** Average Radius of Gyration

**Supplementary Figure 8.** Average connectivity values for PI(3,4)P<sub>2</sub> and PI(4,5)P<sub>2</sub>

**Supplementary Figure 9.** Composite radial distribution function for all lipids

**Supplementary Figure 10.** Curvature analysis for the upper leaflet of each replicate

**Supplementary Figure 11.** Total membrane defect area

**Supplementary Figure 12.** Phylogeny analysis and sequence alignment of PX domains

**Supplementary Figure 13.** Full PX domain PIP<sub>2</sub> contact networks

**Supplementary Figure 14.** Spatial analysis of PX binding pockets

**Supplementary Citations**

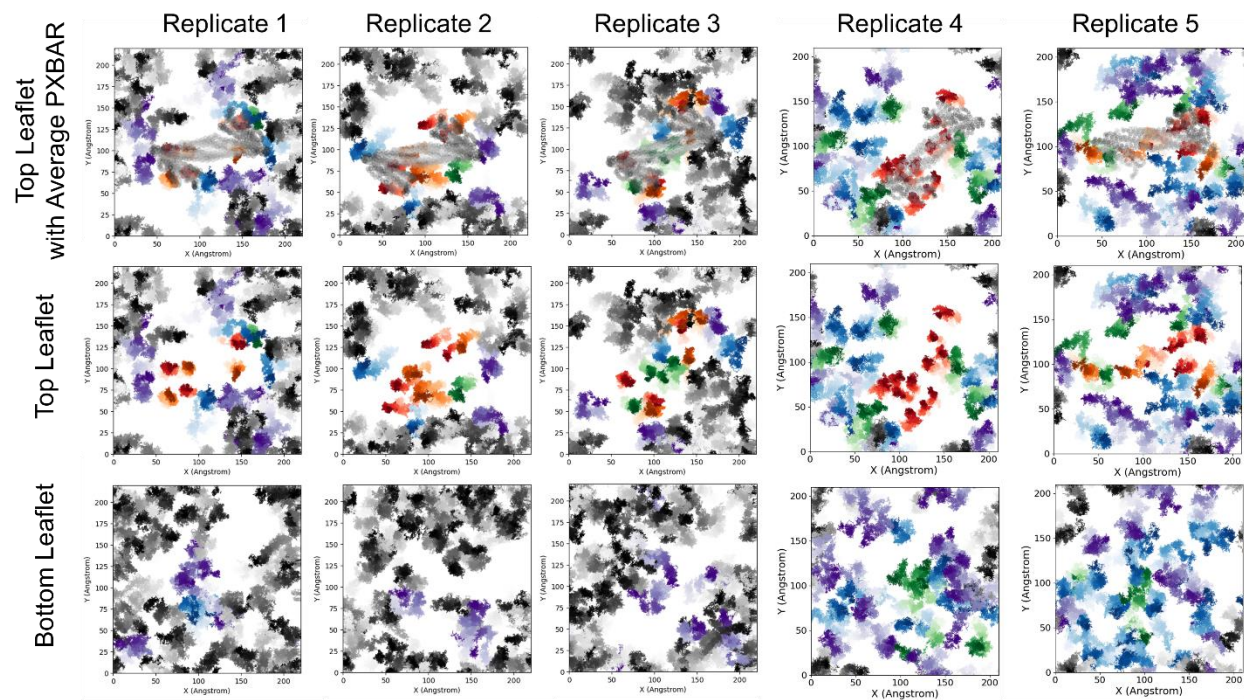

**Supplementary Figure 1.** PI(3,4)P<sub>2</sub> trajectory trace plots for all replicates. Coloring is based on distance traveled by each lipid (see Fig. 5D).

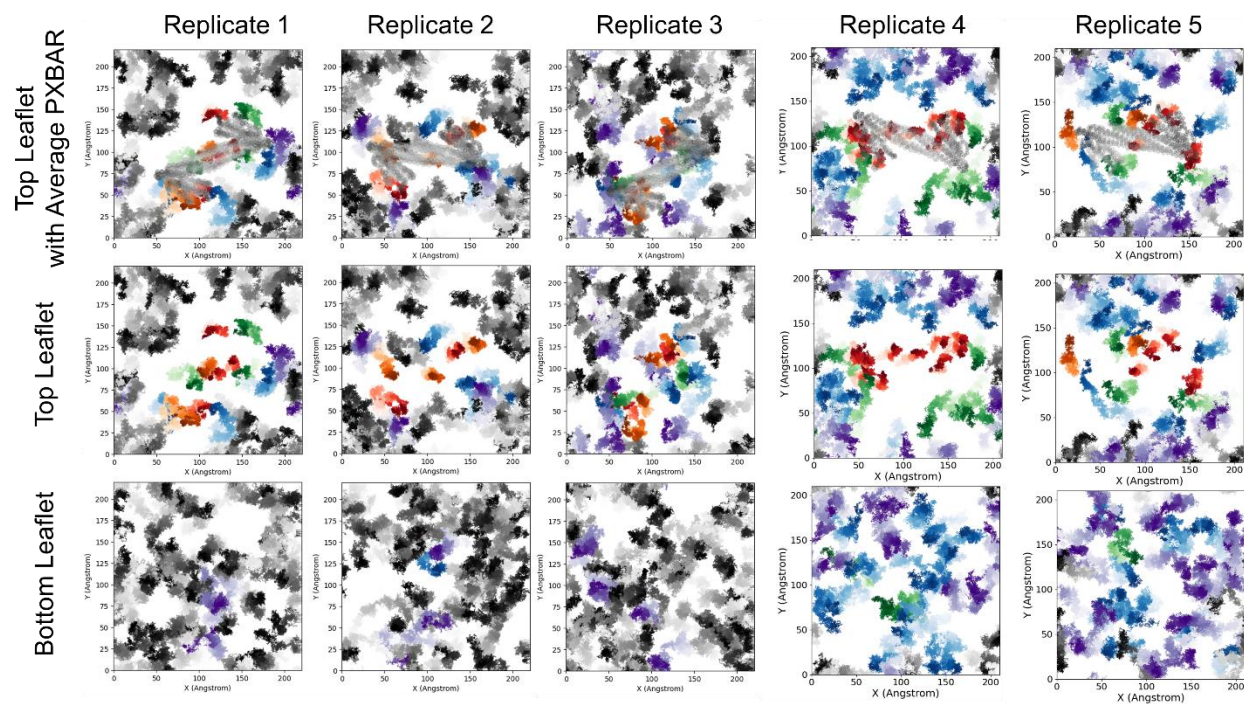

**Supplementary Figure 2.** PI(4,5)P<sub>2</sub> trajectory trace plots for all replicates. Coloring is based on distance traveled by each lipid (see Fig. 5D).



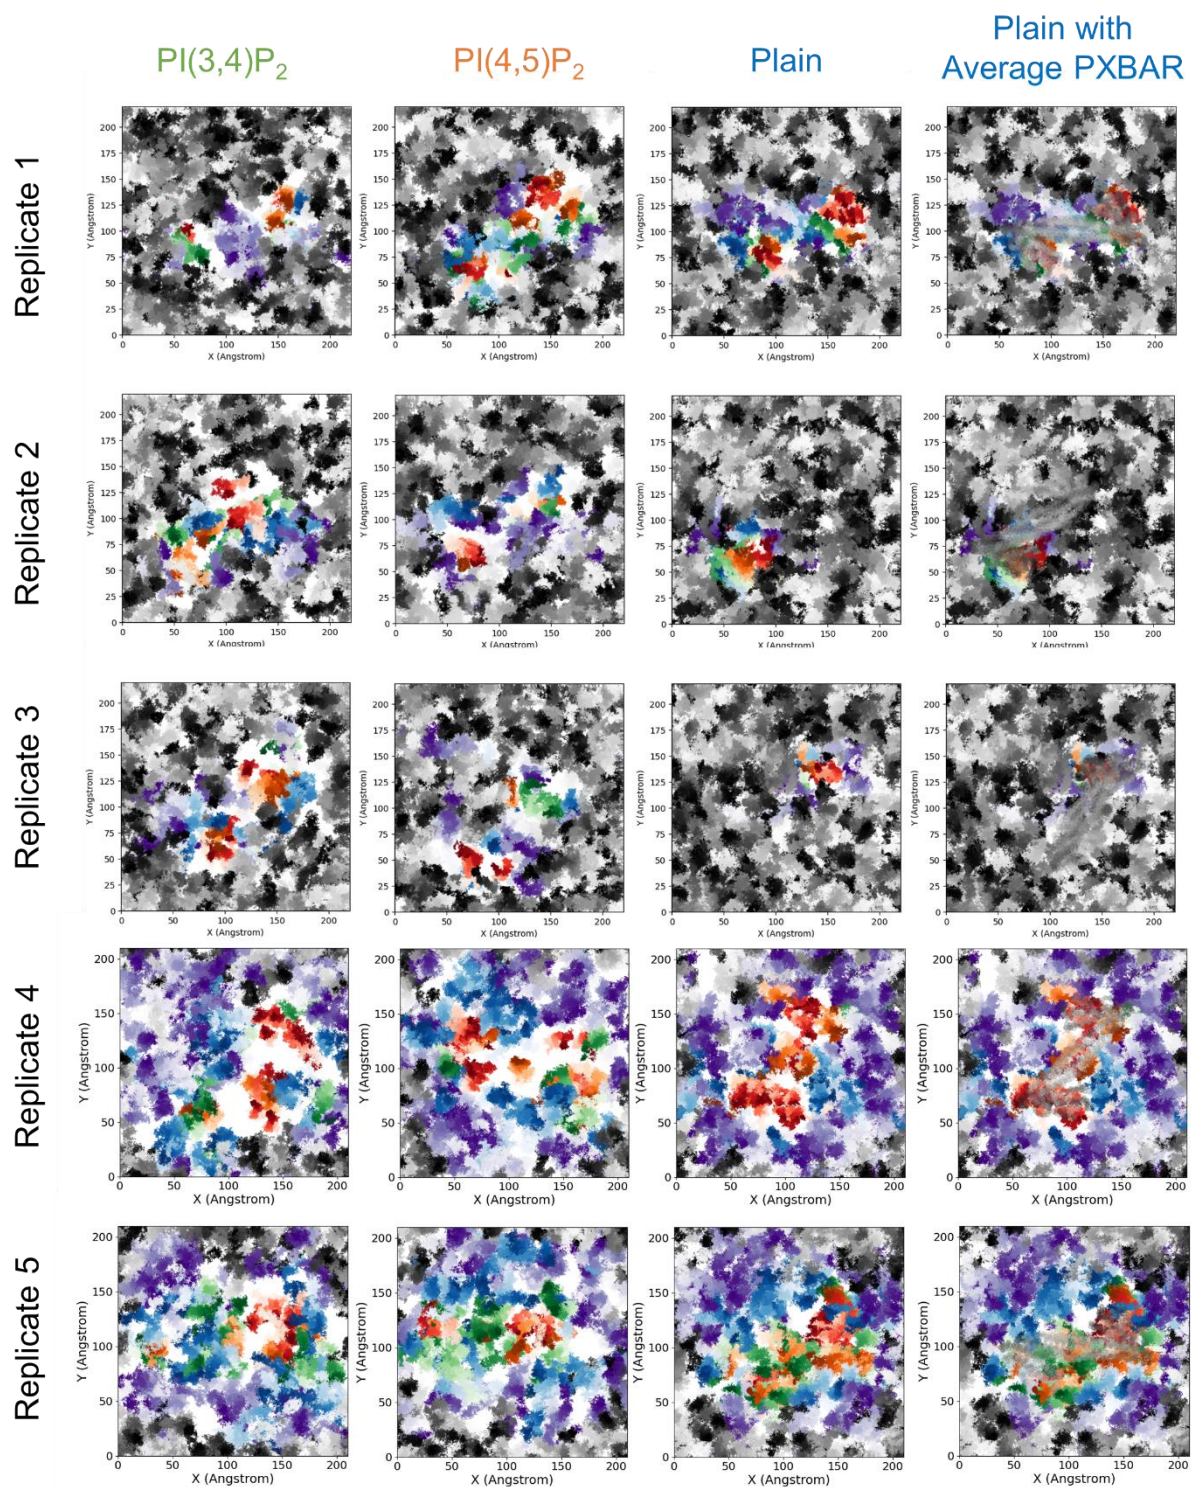

**Supplementary Figure 3.** DOPS trajectory trace plot for the top leaflet in all replicates. Coloring is based on distance traveled by each lipid (see Fig. 5D).



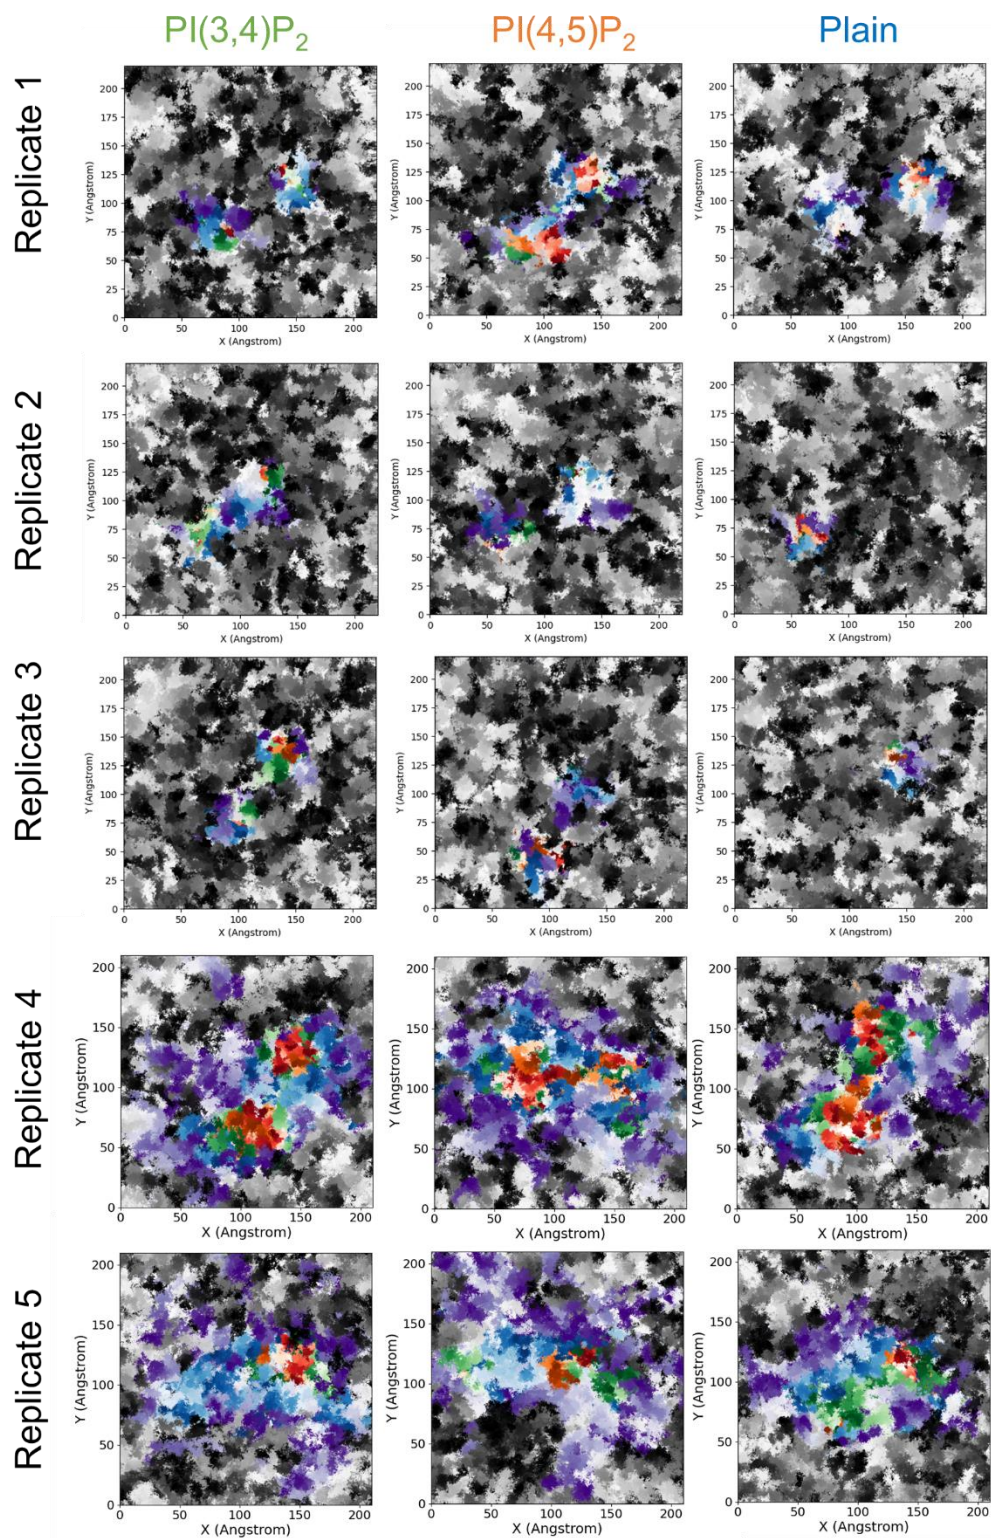

**Supplementary Figure 4.** DOPC trajectory trace plot for the top leaflet in all replicates. Coloring is based on distance traveled by each lipid (see Fig. 5D).

**a**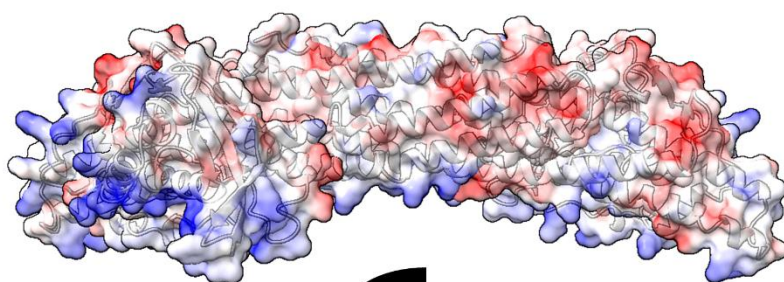

A curved arrow indicating a 90-degree rotation from the side view (a) to the membrane binding interface view (b).

90°

**b**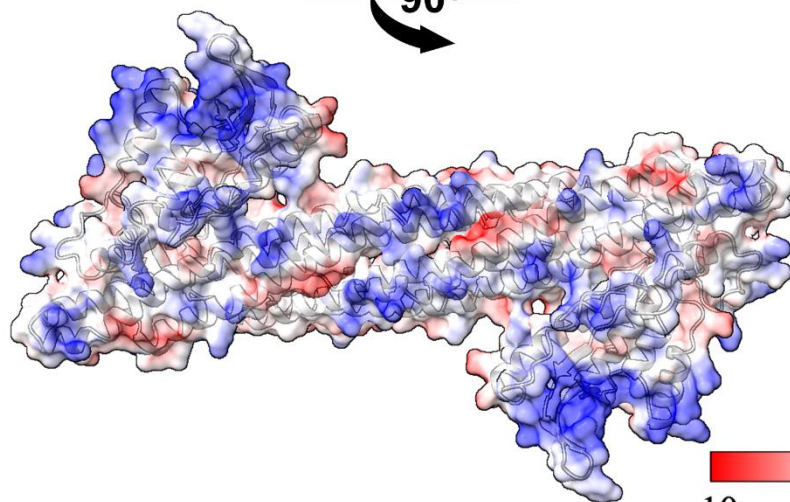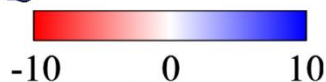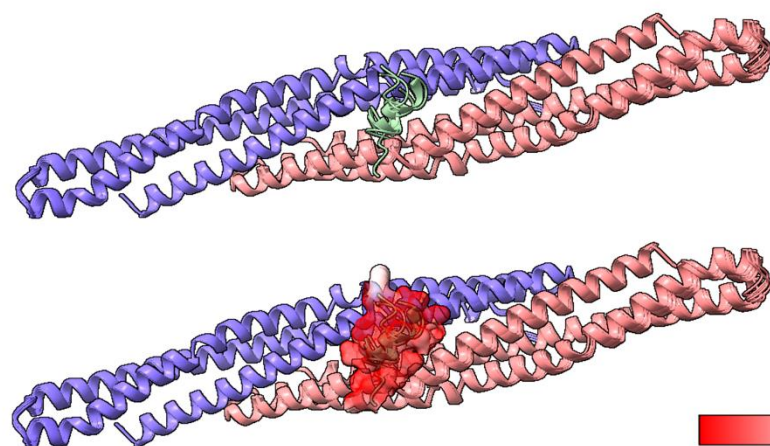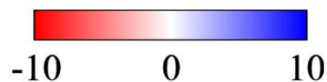

**Supplementary Figure 5.** Electrostatic Map of the PXBAR domain and autoinhibition motif. **(A)** Electrostatic surface map shown transparently over a cartoon representation of the SNX9-PXBAR domain from the side (top) and membrane binding interface (bottom). **(B)** Cartoon (top) and surface (bottom) depiction of predicted BAR domain (blue/pink) and autoinhibition motif (green) interaction from AlphaFold2 <sup>Main Text Ref 39</sup>. Visualization generated with ChimeraX <sup>Main Text Ref 58</sup>.

|                    | <b>PI(3,4)P<sub>2</sub></b> |            |            |              |               |
|--------------------|-----------------------------|------------|------------|--------------|---------------|
|                    | <b>BAR</b>                  | <b>PX1</b> | <b>PX2</b> | <b>Total</b> | <b>PX avg</b> |
| <b>Replicate 1</b> | 3.53                        | 4.17       | 3.56       | 11.26        | 3.87          |
| <b>Replicate 2</b> | 4.76                        | 3.24       | 2.93       | 10.93        | 3.09          |
| <b>Replicate 3</b> | 5.98                        | 3.56       | 3.99       | 13.53        | 3.78          |
| <b>Replicate 4</b> | 5.66                        | 2.00       | 4.15       | 11.81        | 3.08          |
| <b>Replicate 5</b> | 3.75                        | 4.31       | 0.63       | 8.69         | 2.47          |
|                    | <b>PI(4,5)P<sub>2</sub></b> |            |            |              |               |
|                    | <b>BAR</b>                  | <b>PX1</b> | <b>PX2</b> | <b>Total</b> | <b>PX avg</b> |
| <b>Replicate 1</b> | 5.31                        | 2.55       | 4.60       | 12.46        | 3.56          |
| <b>Replicate 2</b> | 3.11                        | 3.25       | 2.79       | 9.15         | 3.02          |
| <b>Replicate 3</b> | 6.08                        | 4.22       | 3.28       | 13.58        | 3.75          |
| <b>Replicate 4</b> | 2.43                        | 4.09       | 4.90       | 11.42        | 4.50          |
| <b>Replicate 5</b> | 3.06                        | 2.46       | 1.08       | 6.60         | 1.77          |

**Supplementary Table 1.** PIP<sub>2</sub> Occupancy values for the SNX9 PX-BAR dimer. Occupancy values based on number of lipids within distance threshold over course of simulation production time – see Fig. 6A for threshold metric visualization.

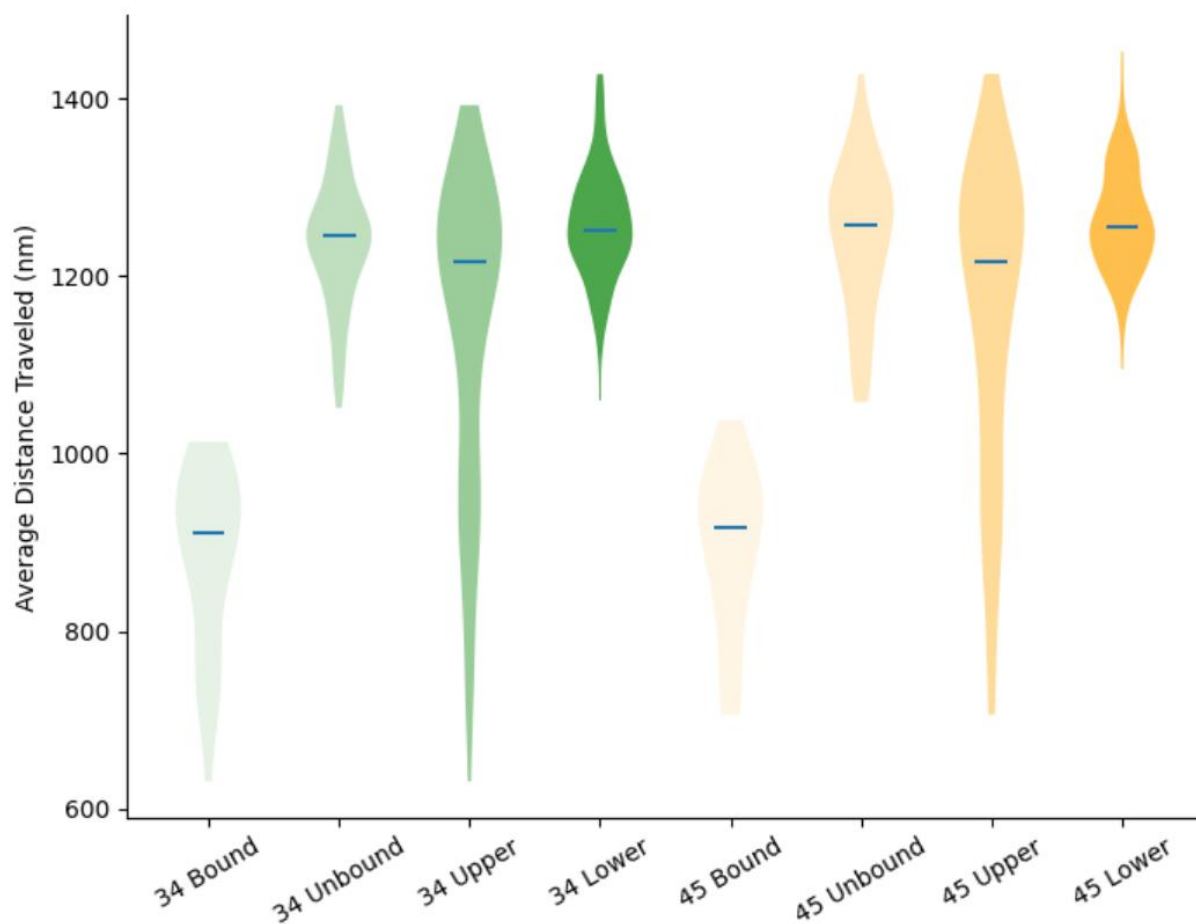

**Supplementary Figure 6.** Composite violin plot of average distance traveled of PIP<sub>2</sub> lipids from all five replicas. “Bound” and “unbound” refer to lipids in the upper leaflet that are either within the threshold distance (see Fig. 6A) or outside, respectively.



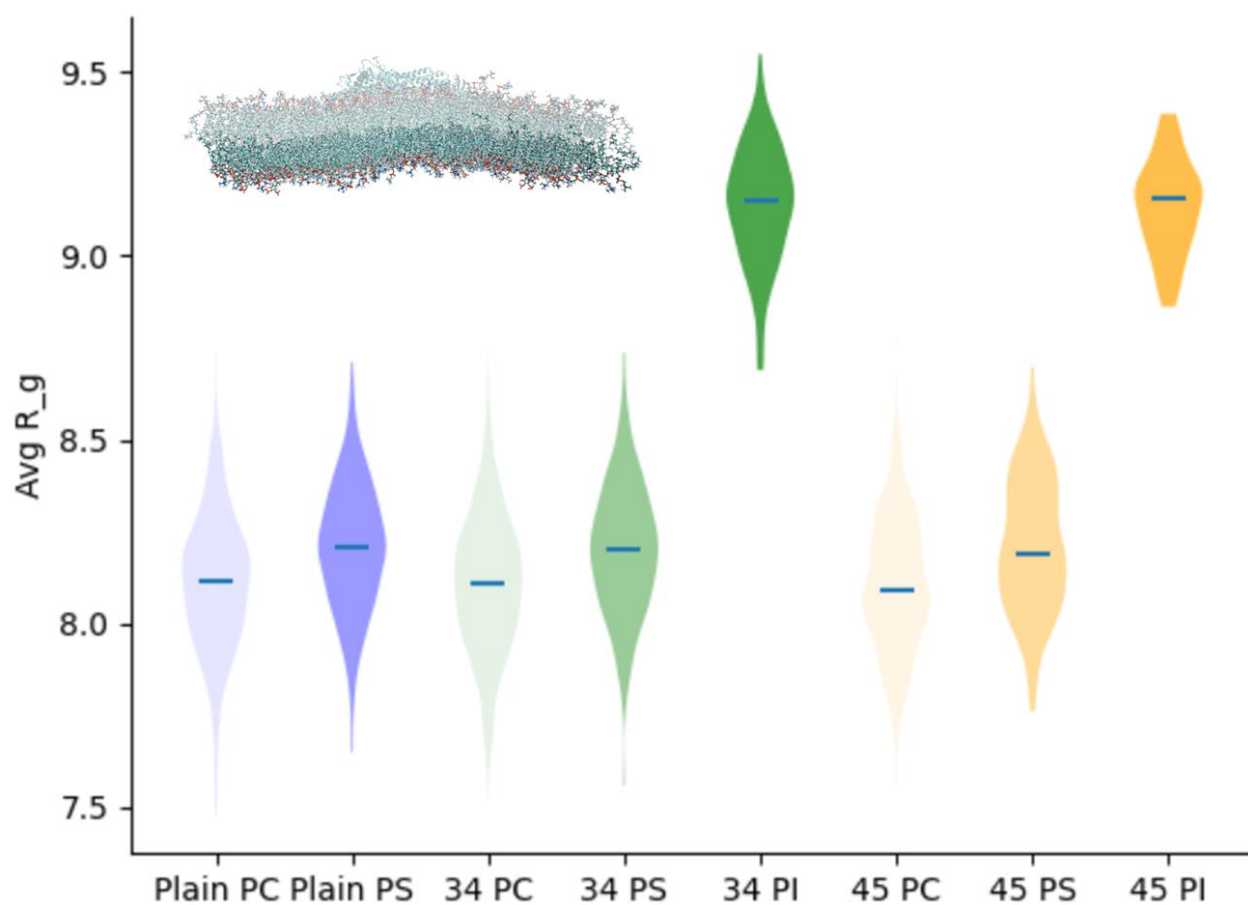

**Supplementary Figure 7.** Average Radius of Gyration of lipids in lower leaflets across all five replicates. Lower leaflet is defined as leaflet that does not have protein bound to it (see inset representation).

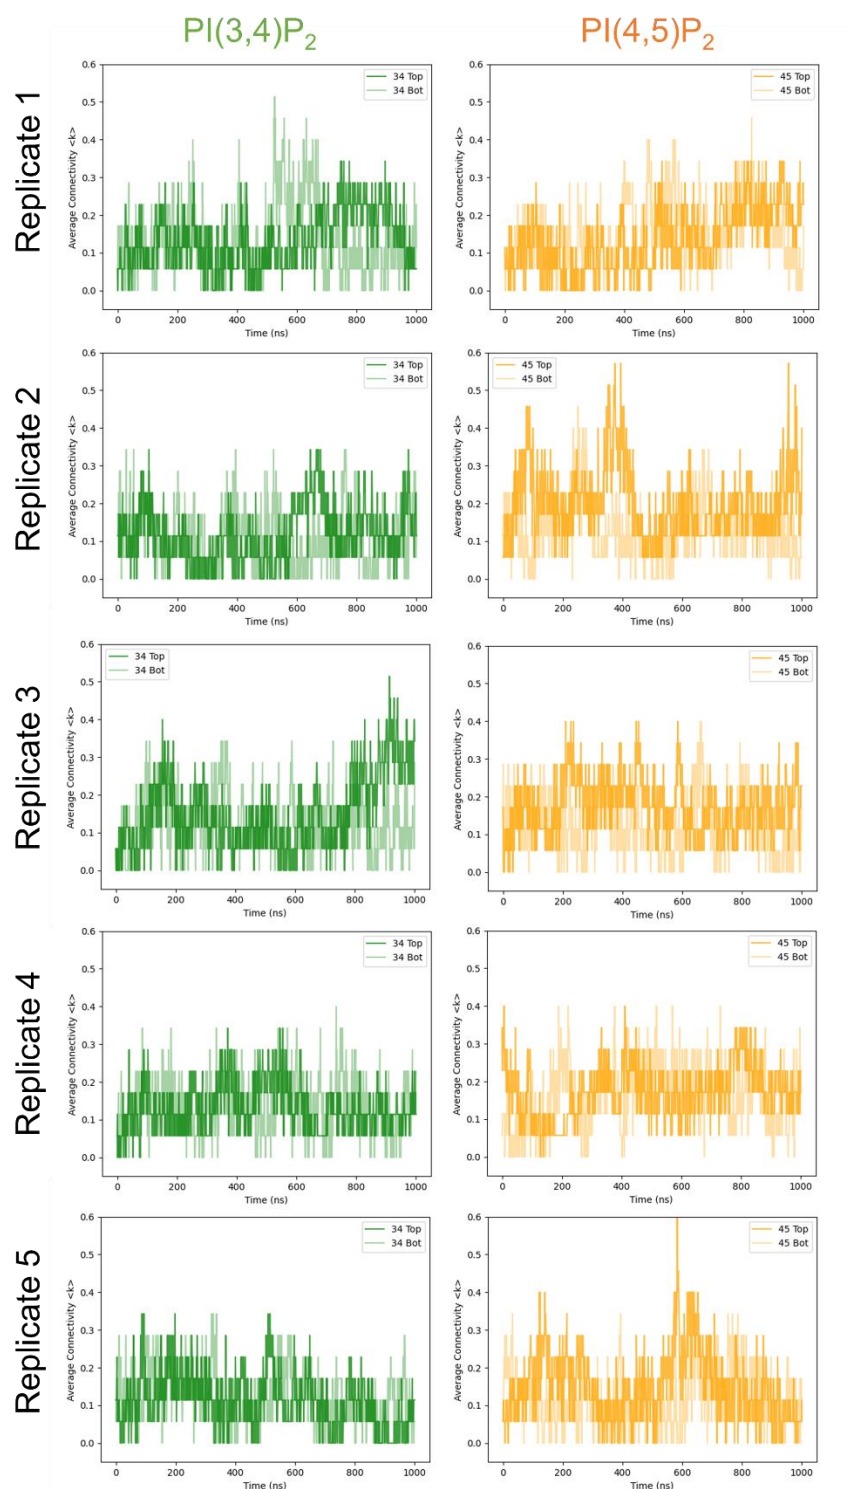

**Supplementary Figure 8.** Average connectivity  $\langle k \rangle$  values for PI(3,4)P<sub>2</sub> and PI(4,5)P<sub>2</sub> as a function of time over the course of each replicate, based on analysis in <sup>Main Text Ref 41</sup>. Dark green or orange indicates the clustering values for top leaflet, while light green or orange indicates the clustering values for the lower leaflet.

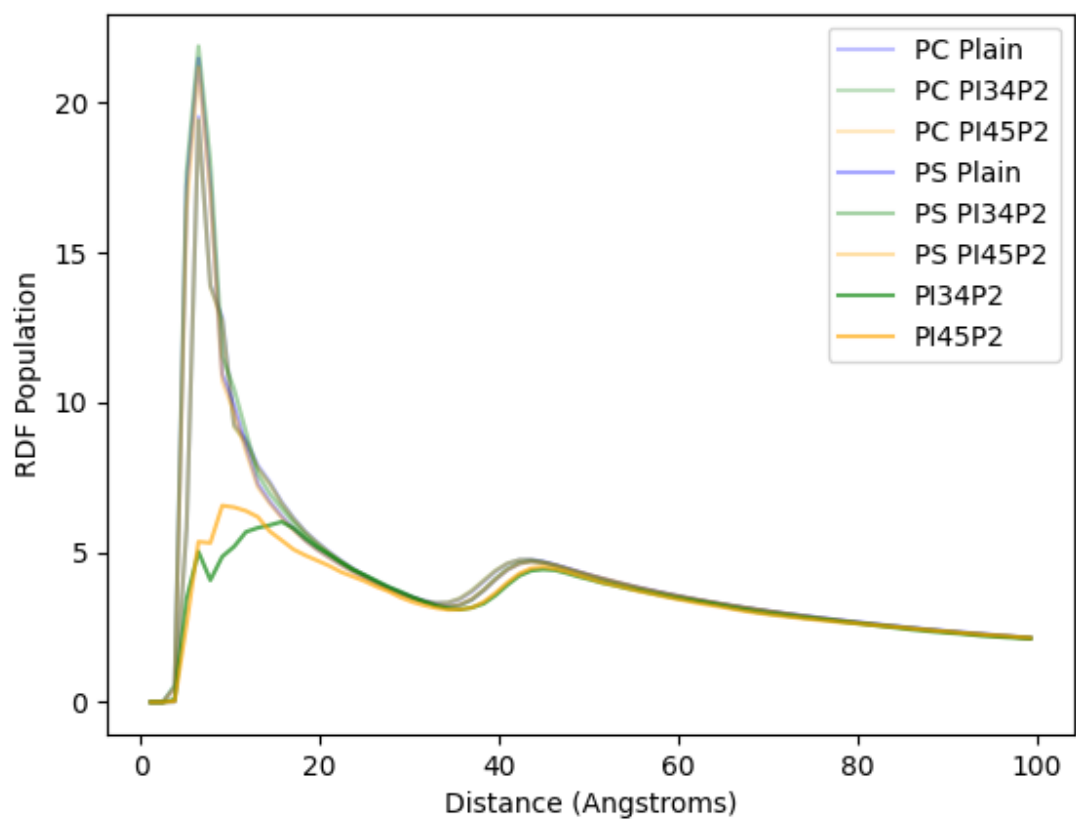

**Supplementary Figure 9.** Composite self-radial distribution function for all lipids.



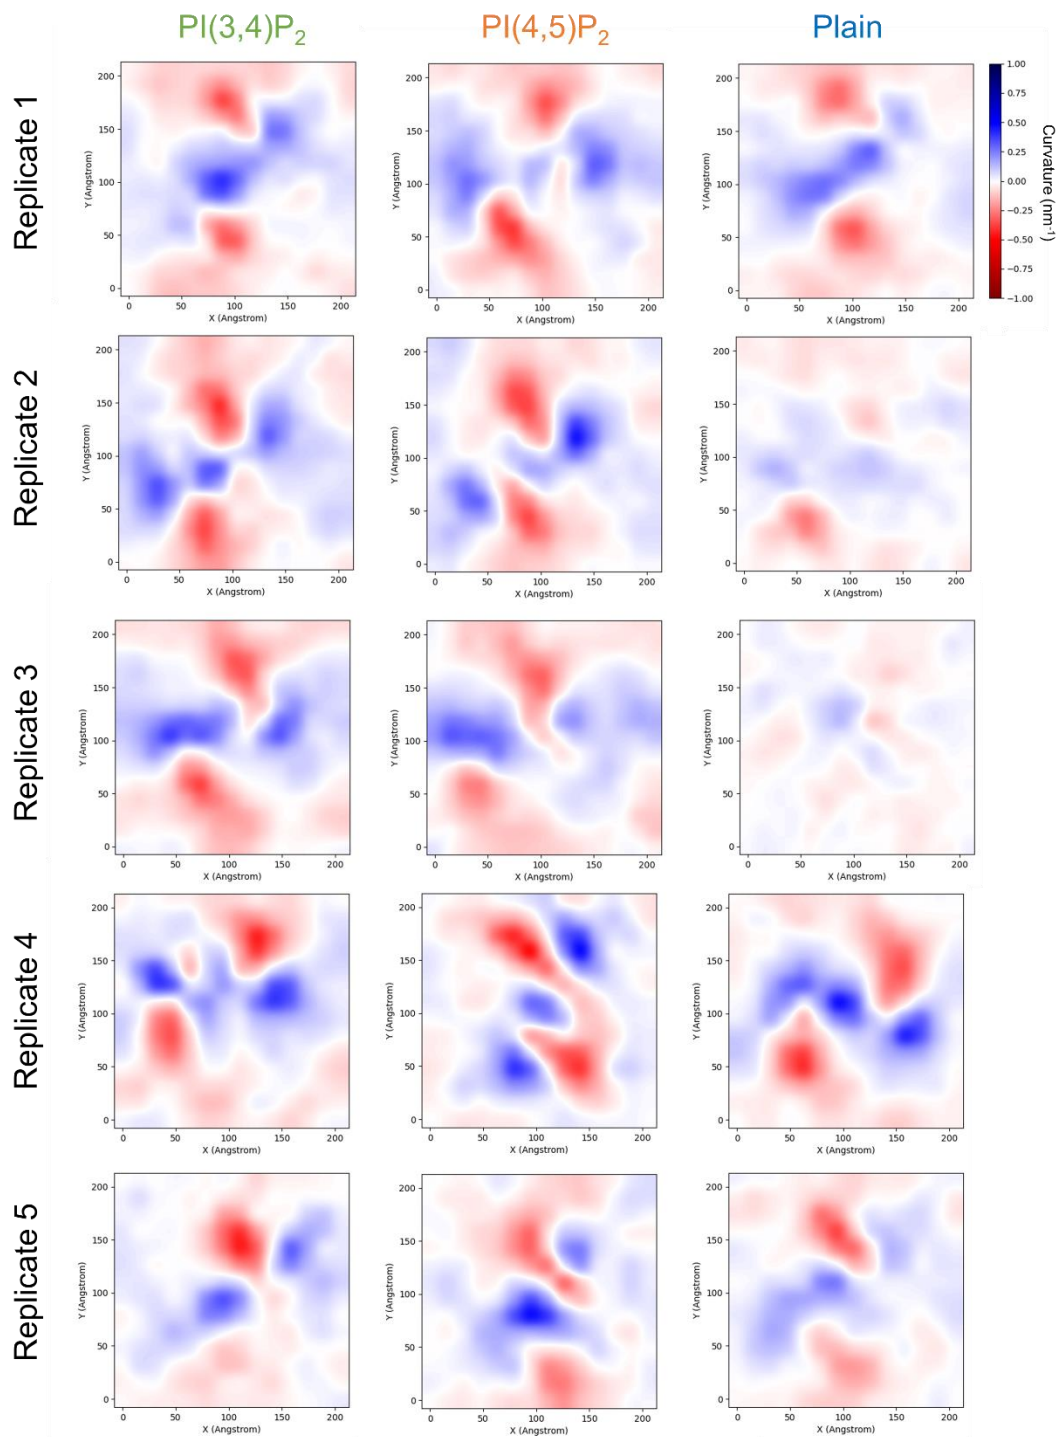

**Supplementary Figure 10.** Curvature analysis for the upper leaflet of each replicate.

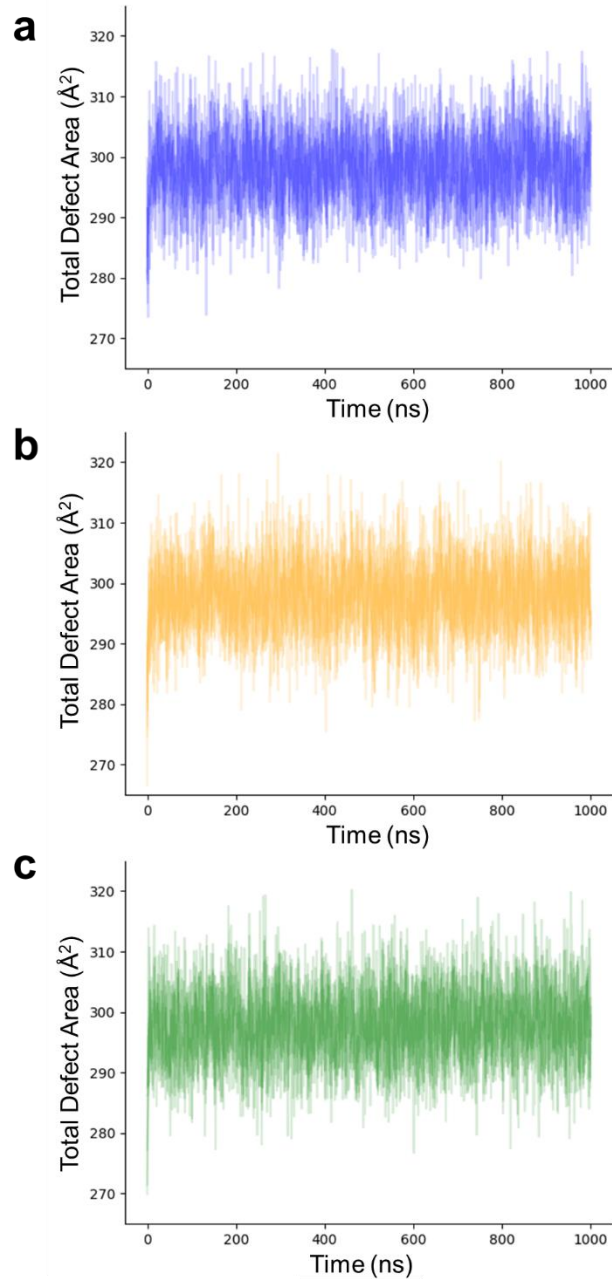

**Supplementary Figure 11.** Total membrane defect area for both the upper and lower membrane leaflets over the course of the simulation trajectories, based on Packmem script <sup>1</sup>. Individual trajectories for each replicate are plotted for the membranes without PIP<sub>2</sub> (**a**), membranes with 5% PI(4,5)P<sub>2</sub> (**b**), and membranes with 5% PI(3,4)P<sub>2</sub> (**c**).

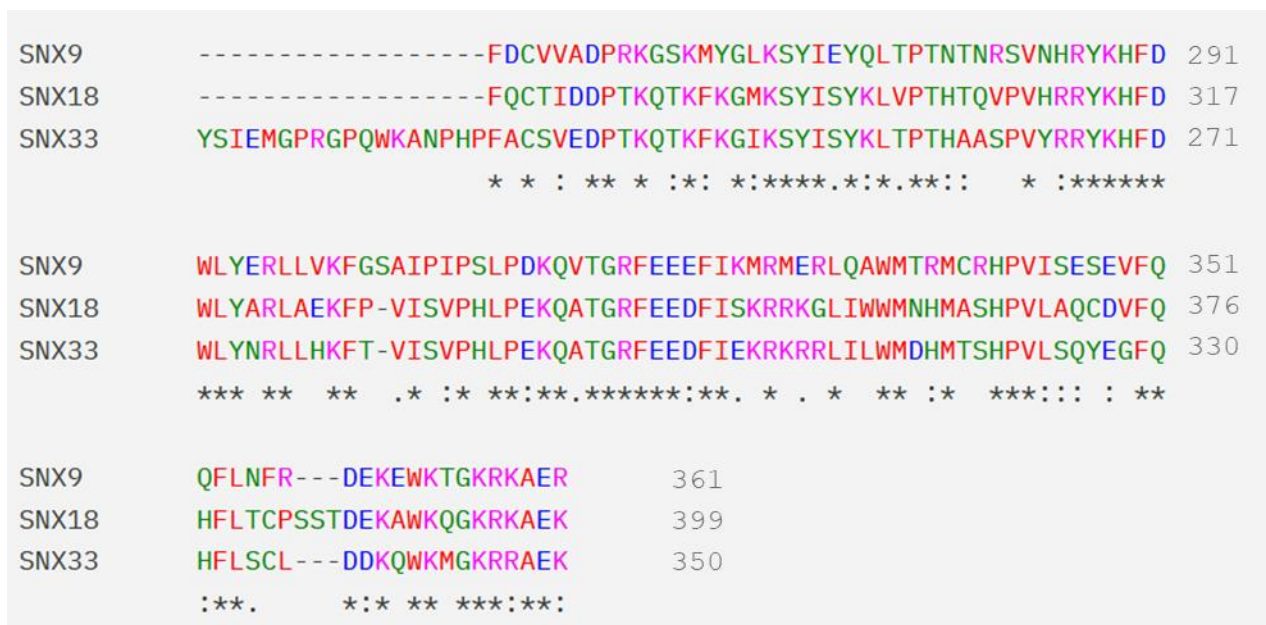

**Supplementary Figure 12.** Phylogeny analysis and sequence alignment of PX domains of closely related PXBAR containing SNX proteins, conducted using the CLUSTAL OMEGA MSA program<sup>2</sup>. MSA of PX domains of SNX9, SNX18, and SNX33, with color to indicate amino acid properties such as charge or hydrophobicity. \* indicates an amino acid identically conserved in all three proteins; : indicates a higher conservation of property but not identity; and . indicates a lower conservation of property.



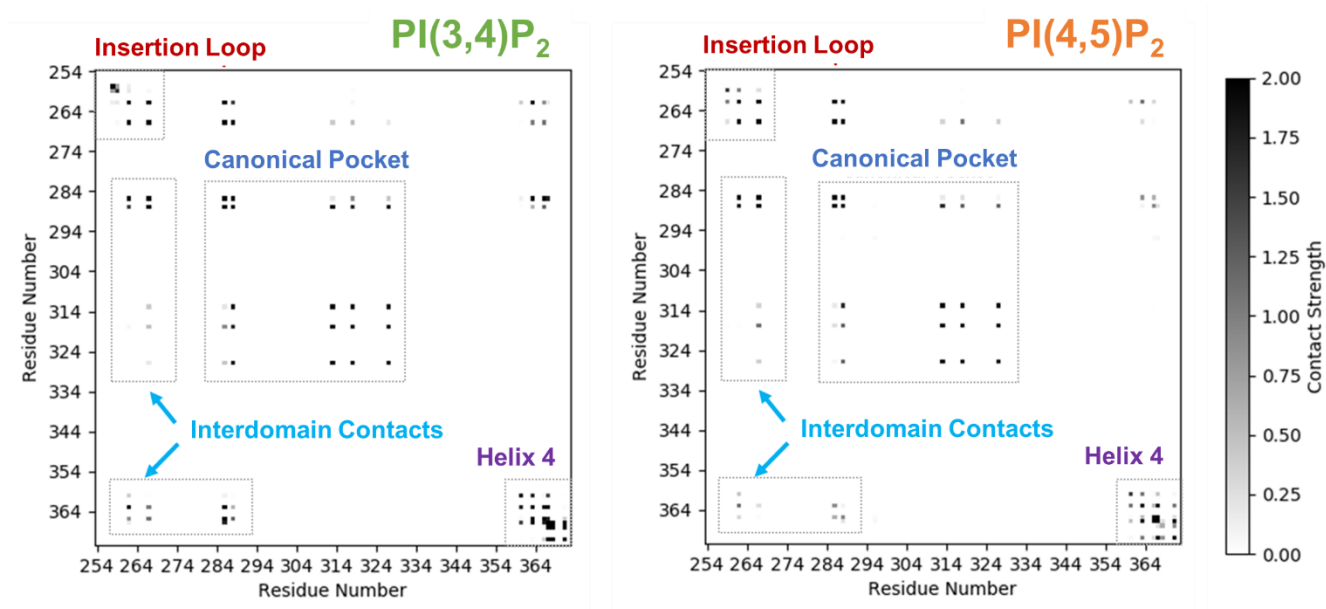

**Supplementary Figure 13.** Full PX domain PIP<sub>2</sub> contact networks, with PI(3,4)P<sub>2</sub> (*Left*) and PI(4,5)P<sub>2</sub> (*Right*). Contact metric based on Bjerrum distance (see Fig. 7b).

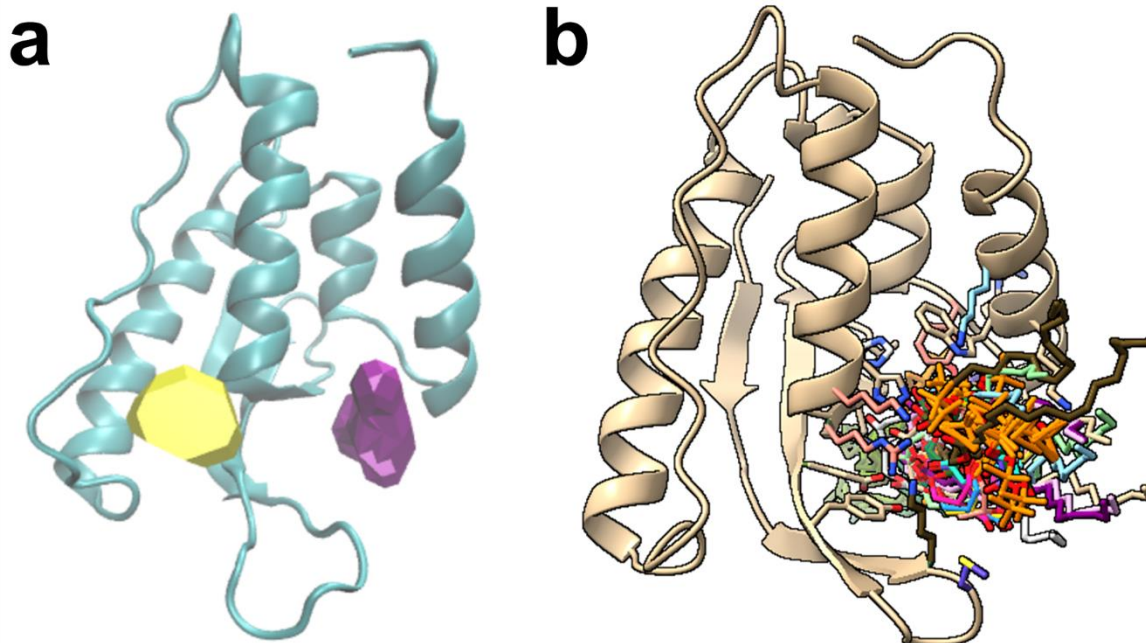

**Supplementary Figure 14.** Spatial analysis of PX binding pockets. **(a)** Cavity analysis<sup>3</sup> of the PX domain of 2RAK, visualized with VMD<sup>Main Text Ref 59</sup>, demonstrates two major binding pockets with volumes of 745 Å<sup>3</sup> (yellow, canonical pocket) and 905 Å<sup>3</sup> (purple, helix four pocket). **(b)** Docking<sup>4</sup> of the ten most likely predicted PIP<sub>2</sub> positions for PI(3,4)P<sub>2</sub> and PI(4,5)P<sub>2</sub>, visualized with ChimeraX<sup>Main Text Ref 58</sup>.

## Supplementary Citations

- 1 Gautier, R. *et al.* Packmem: A versatile tool to compute and visualize interfacial packing defects in lipid bilayers. *Biophys J* **115**, 436-444 (2018).  
<https://doi.org/10.1016/j.bpj.2018.06.025>
- 2 Madeira, F. *et al.* The EMBL-EBI Job Dispatcher sequence analysis tools framework in 2024. *Nucleic Acids Res* **52**, W521-W525 (2024).  
<https://doi.org/10.1093/nar/gkae241>
- 3 Durrant, J. D., Votapka, L., Sørensen, J. & Amaro, R. E. POVME 2.0: an enhanced tool for determining pocket shape and volume characteristics. *J Chem Theory Comput* **10**, 5047-5056 (2014). <https://doi.org/10.1021/ct500381c>
- 4 Singh, A., Copeland, M. M., Kundrotas, P. J. & Vakser, I. A. GRAMM web server for protein docking. *Methods Mol Biol* **2714**, 101-112 (2024).  
[https://doi.org/10.1007/978-1-0716-3441-7\\_5](https://doi.org/10.1007/978-1-0716-3441-7_5)
